# Supplementary material
Source: PubMed Central journal article supplement (PMC2651334)
Supplement: 0813264106_0813264106SI.pdf [file 0813264106_0813264106SI.pdf]

# Supporting Information

Sieglaff *et al.* 10.1073/pnas.0813264106

## SI References

1. Mahony S, Auron PE, Benos PV (2007) DNA familial binding profiles made easy: Comparison of various motif alignment and clustering strategies. *PLoS Comput Biol* 3:e61.
2. Pavlidis P, Noble WS (2003) Matrix2png: A utility for visualizing matrix data. *Bioinformatics* 19:295–296.
3. Sanders HR, Evans AM, Ross LS, Gill SS (2003) Blood meal induces global changes in midgut gene expression in the disease vector, *Aedes aegypti*. *Insect Biochem Mol Biol* 33:1105–1122.
4. Wu J, Sieglaff D-H, Gervin J, Xie X-S (2008) Discovering regulatory motifs in the *Plasmodium* genome using comparative genomics. *Bioinformatics* 24:1843–1849.
5. Marinotti O, *et al.* (2006) Genome-wide analysis of gene expression in adult *Anopheles gambiae*. *Insect Mol Biol* 15:1–12.
6. Saeed AI, *et al.* (2003) TM4: A free, open-source system for microarray data management and analysis. *BioTechniques* 34:374–378.
7. Benjamini Y, Hochberg Y (1995) Controlling the false discovery rate: A practical and powerful approach to multiple testing. *J R Statist Soc B* 57:289–300.
8. Arca B, *et al.* (2005) An updated catalogue of salivary gland transcripts in the adult female mosquito, *Anopheles gambiae*. *J Exp Biol* 208:3971–3986.
9. Dittmer NT, *et al.* (2003) CRDB isoform represses yolk protein gene expression in the mosquito fat body. *Mol Cell Endocrinol* 210–39–49.
10. Pham DQ, Douglass PL, Chavez CA, Shaffer JJ (2005) Regulation of the ferritin heavy-chain homologue gene in the yellow fever mosquito, *Aedes aegypti*. *Insect Mol Biol* 14:223–236.
11. Kokoza VA, *et al.* (2001) Transcriptional regulation of the mosquito vitellogenin gene via a blood meal-triggered cascade. *Gene* 274:47–65.
12. Ahmed A, *et al.* (1999) Genomic structure and ecdysone regulation of the prophenoloxidase 1 gene in the malaria vector *Anopheles gambiae*. *Proc Natl Acad Sci USA* 96:14795–14800.
13. Giannoni F, *et al.* (2001) Nuclear factors bind to a conserved DNA element that modulates transcription of *Anopheles gambiae* trypsin genes. *J Biol Chem* 276:700–707.
14. Cho KH, *et al.* (2006) Regulatory region of the vitellogenin receptor gene sufficient for high-level, germ line cell-specific ovarian expression in transgenic *Aedes aegypti* mosquitoes. *Insect Biochem Mol Biol* 36:273–281.
15. Meredith JM, *et al.* (2006) A novel association between clustered NF-kappaB and C/EBP binding sites is required for immune regulation of mosquito *Defensin* genes. *Insect Mol Biol* 15:393–401.
